# Supplementary material for: Interactions, electronic and optical properties of nanographene–peptide complexes: a theoretical study
Source: Royal Society of Chemistry journal article supplement (doi:10.1039/d0ra07961h), 2020-01-01
Supplement: d0ra07961h1.pdf [file d0ra07961h1.pdf]

## **Supplementary Information**

**Title: Interactions, Electronic and Optical properties of Nanographene- Peptide Complexes: A Theoretical Study**

**Submitted by:** Ruby Srivastava,

CSIR-Centre for Cellular and Molecular Biology,

Hyderabad.

| Complexes    | B3LYP/6-31G* | M06/6-31G* | B3LYP-D2/6-31G* |
|--------------|--------------|------------|-----------------|
| nanographene | -2740.32     | -2740.36   | -2741.24        |
| arg          | -531.788     | -530.877   | -531.988        |
| asn          | -416.129     | -416.959   | -417.329        |
| gln          | -455.652     | -456.239   | -456.488        |
| his-c        | -473.131     | -473.744   | -474.016        |
| lys-c        | -421.363     | -422.100   | -422.242        |
| phe          | -479.266     | -479.428   | -479.504        |
| try          | -610.281     | -610.700   | -611.063        |
| tyr          | -553.787     | -554.409   | -554.724        |

Supplementary Table 1: Optimized energy values for nanographene and all the peptides with three different DFT (a)B3LYP/6-31G\*, (b) M06/6-31G\* and (c) B3LYP-D2/6-31G\* methods.

| Complexes    | HL Gap (eV) | Dipole moment (Debye) | Polarizability |
|--------------|-------------|-----------------------|----------------|
| nanographene | 3.86        | 0.001                 | 474.22         |
| arg          | 4.23        | 5.721                 | 66.23          |
| asn          | 7.11        | 4.522                 | 32.22          |
| gln          | 7.31        | 5.421                 | 49.86          |
| his-c        | 6.33        | 3.572                 | 45.37          |
| lys-c        | 6.70        | 4.035                 | 54.18          |
| phe          | 7.21        | 3.277                 | 52.56          |
| try          | 6.14        | 4.843                 | 72.45          |
| tyr          | 6.72        | 4.366                 | 66.78          |

Supplementary Table 2: HL Gap (eV), Dipole moment (Debye) and Polarizability of nanographene(g) and arg, asn, gln, his-c, lys-c, phe, try and tyr peptides in aqueous medium by B3LYP-D2/6-31G\*DFT method.

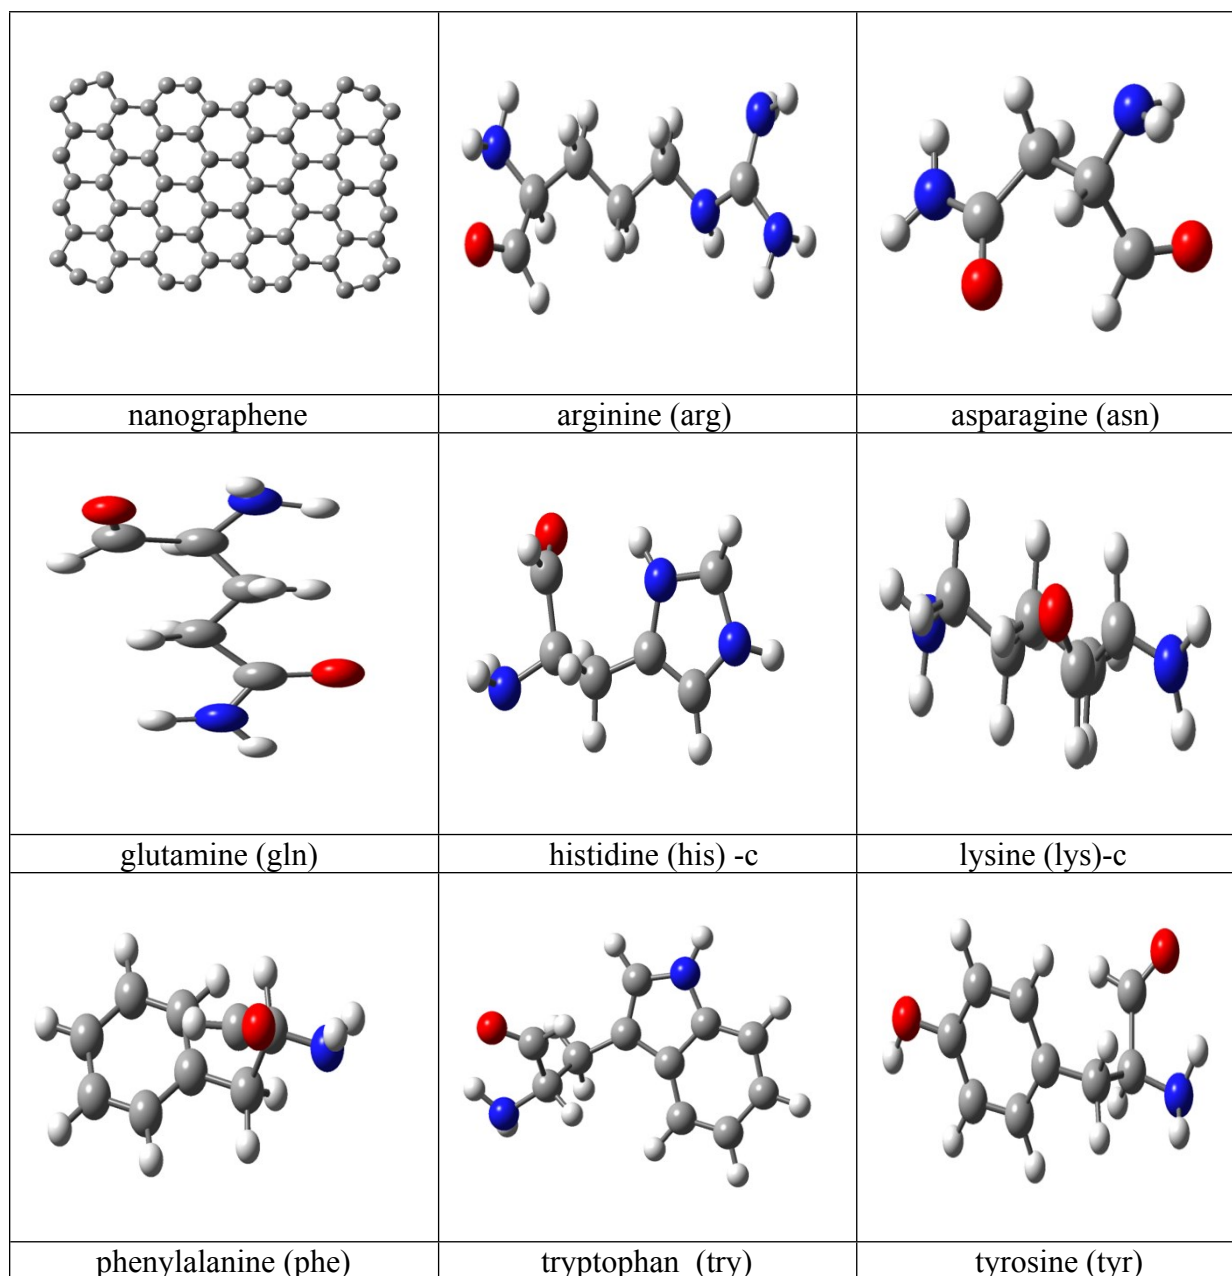

Supplementary Figure 1: Optimized structures of nanographene and peptide complexes in aqueous medium by B3LYP-D2/6-31G\* DFT method.

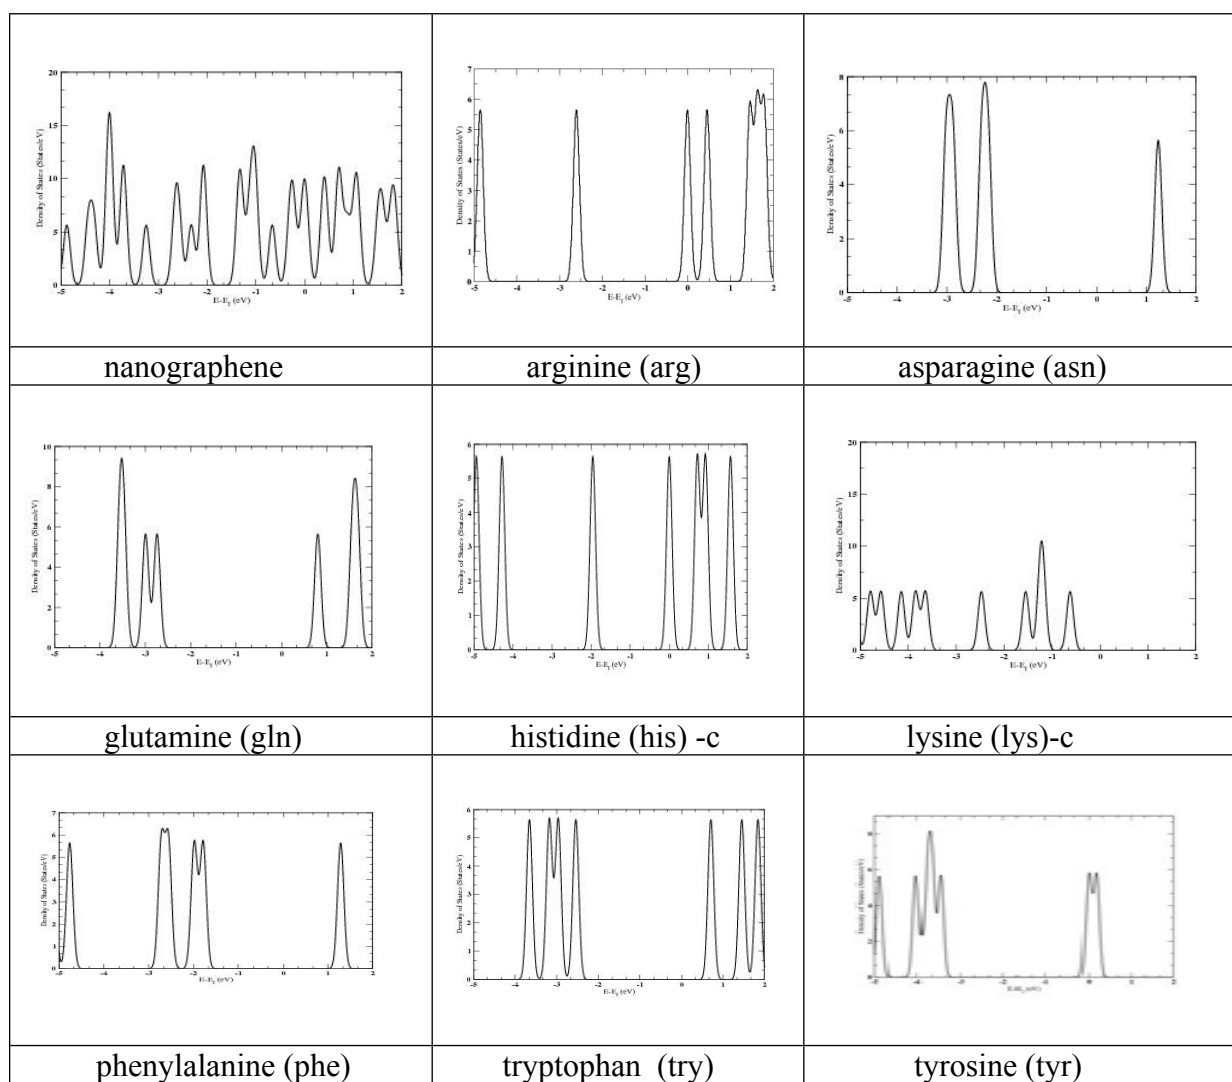

Supplementary Figure 2: Density of States (DOS) graph for nanographene (g) and arg, asn, gln, his-c, lys-c, phe, try and tyr peptides.

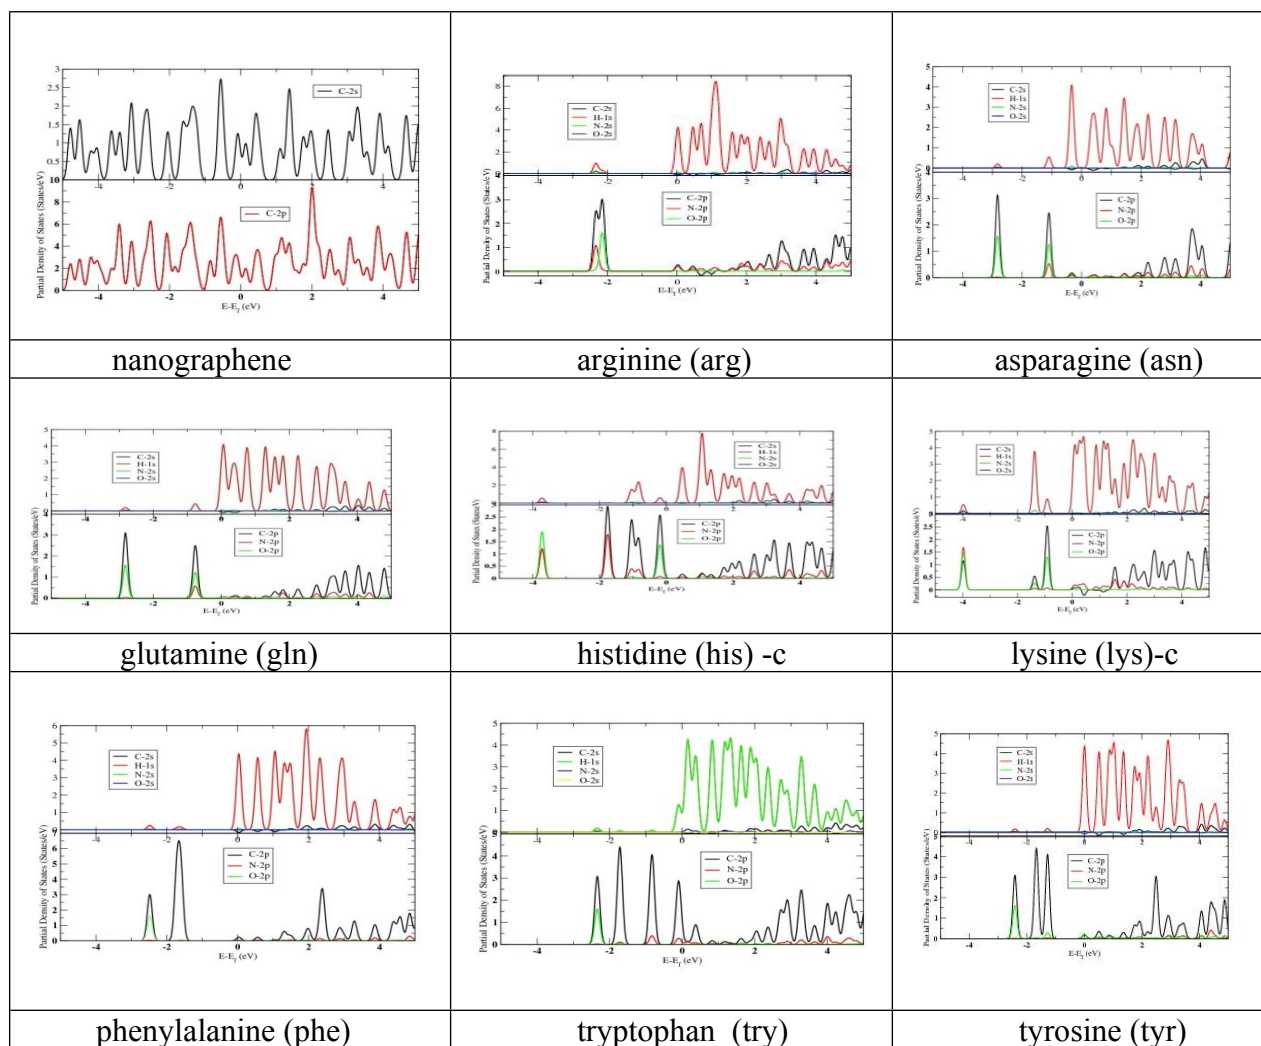

Supplementary Figure 3: Partial density of States (PDOS) graph for nanographene (g) and arg, asn, gln, his-c, lys-c, phe, try and tyr peptides.
